# Supplementary figures and images for: Highly sensitive and selective colorimetric detection of dual metal ions (Hg2+and Sn2+) in water: an eco-friendly approach
Source: Royal Society of Chemistry journal article supplement (doi:10.1039/d0ra09926k), 2021-01-01

## Supporting Information

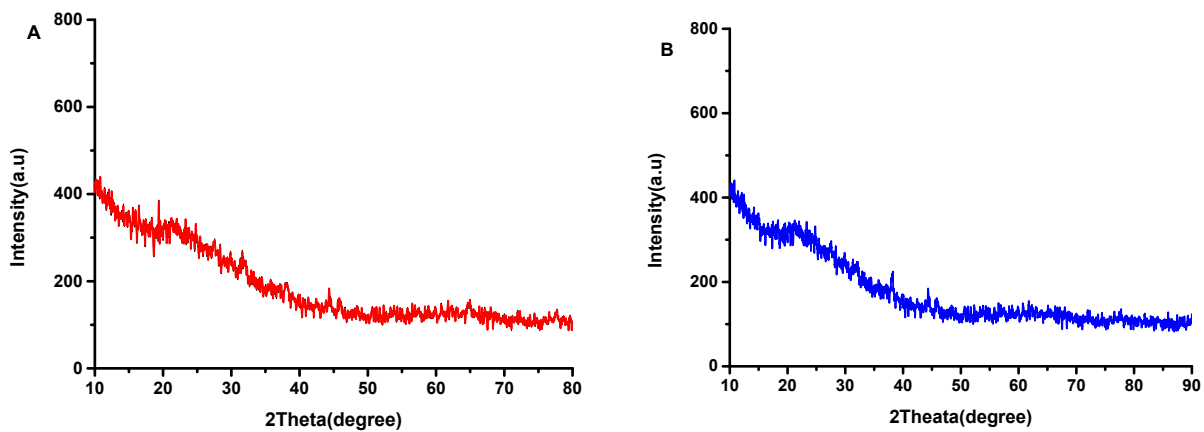

Fig. 1S: XRD spectra of A) Ag NPs + Hg<sup>2+</sup> and B) Ag NPs + Sn<sup>2+</sup>

Supplement: d0ra09926k1.pdf [file d0ra09926k1.pdf]
